# Supplementary material for: Investigating the autophagy pathway in silver@gold core–shell nanoparticles-treated cells using surface-enhanced Raman scattering
Source: Royal Society of Chemistry journal article supplement (doi:10.1039/c8an00405f), 2018-01-01
Supplement: c8an00405f1.pdf [file c8an00405f1.pdf]

## Electronic Supplementary Information

### Investigating the Autophagic Pathway in Silver@Gold Core Shell

### Nanoparticles-Treated Cells Using Surface-Enhanced Raman Scattering

Yuqing Hou<sup>a</sup>, Wen Zhang <sup>a, b</sup>, Shengtao Li<sup>a</sup>, Zhen Wang<sup>a</sup>, Huiqing Zhong<sup>a</sup>, Zhiming Liu<sup>a\*</sup> and Zhouyi Guo<sup>a\*</sup>

<sup>a</sup> MOE Key Laboratory of Laser Life Science & SATCM Third Grade Laboratory of Chinese Medicine and Photonics Technology, College of Biophotonics, South China Normal University, Guangzhou 510631, Guangdong, China.

<sup>b</sup> Institute for Brain Research and Rehabilitation, South China Normal University, Guangzhou, 510631, Guangdong, China

\* Corresponding to: Dr. Zhiming Liu and Prof.

Zhouyi Guo, Telephone and fax: 86-20-

85211428

E-mail: liuzm021@126.com (Dr. Z.M. Liu); ann@scnu.edu.cn (Prof. Z.Y. Guo)

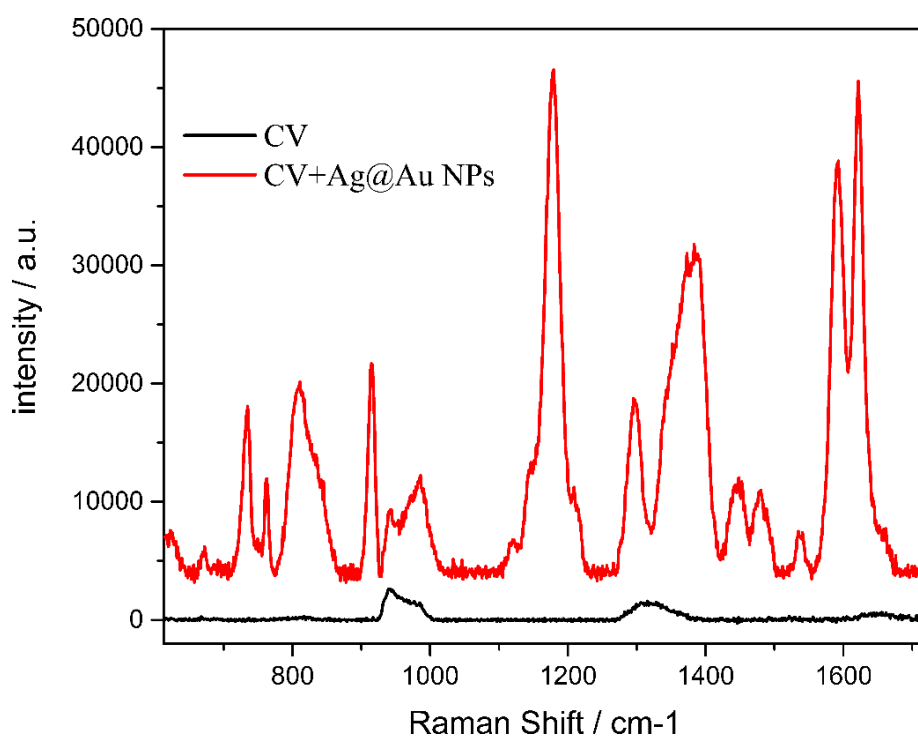

**Fig.S1** SERS spectra of 0.1 mM CV in Ag@Au NPs aqueous solution and the normal Raman spectrum of CV aqueous solution at the same concentration.

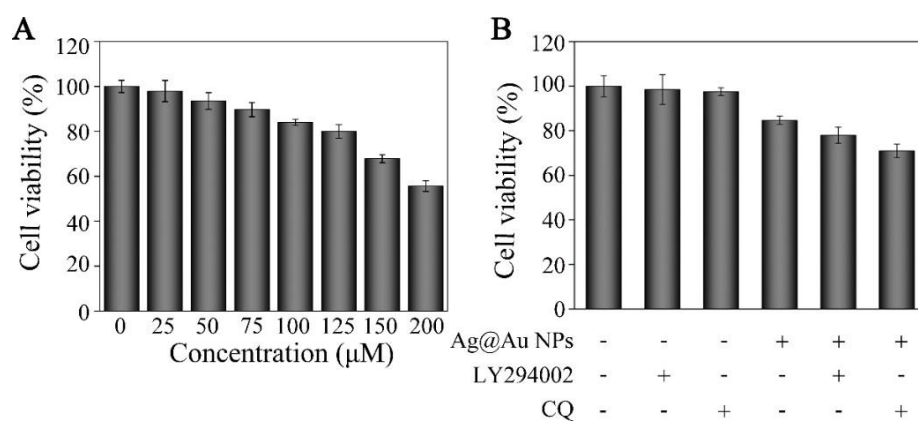

**Fig. S2** (A) Cell viability of Hep G2 cells incubated with Ag@Au NPs (0–200 μM) for 12 h. (B) Relative cell viability of Hep G2 cells incubated for 12 hours under different conditions. Data are presented as means ± SD.

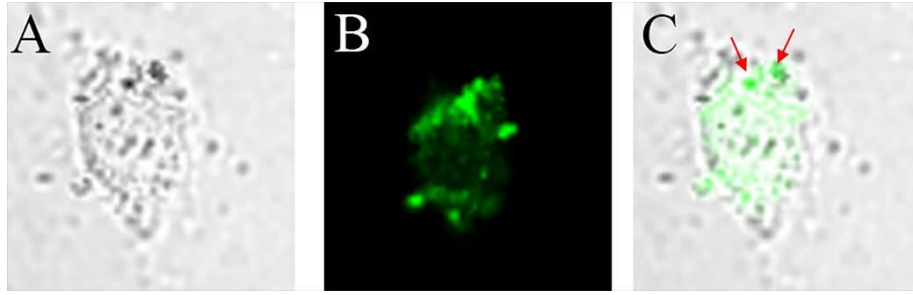

**Fig. S3** (A-C) Bright-field, fluorescence, and merged images of Hep G2 cells cultured with 125  $\mu$ M Ag@Au NPs for 12 hours. The red arrow points to the overlap of Ag@Au NPs and autophagosomes.

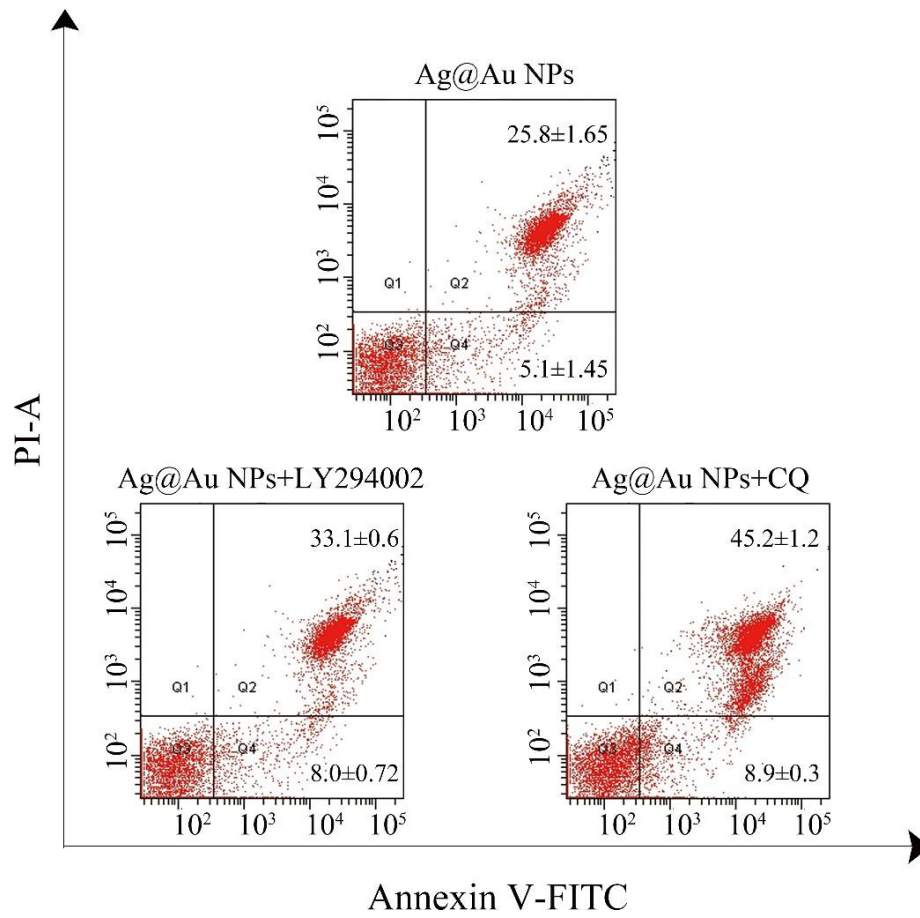

**Fig. S4** Flow cytometry analysis of apoptosis of Hep G2 cells with different treatment. Ag@Au NPs (control), Ag@Au NPs+LY294002, Ag@Au NPs+CQ.

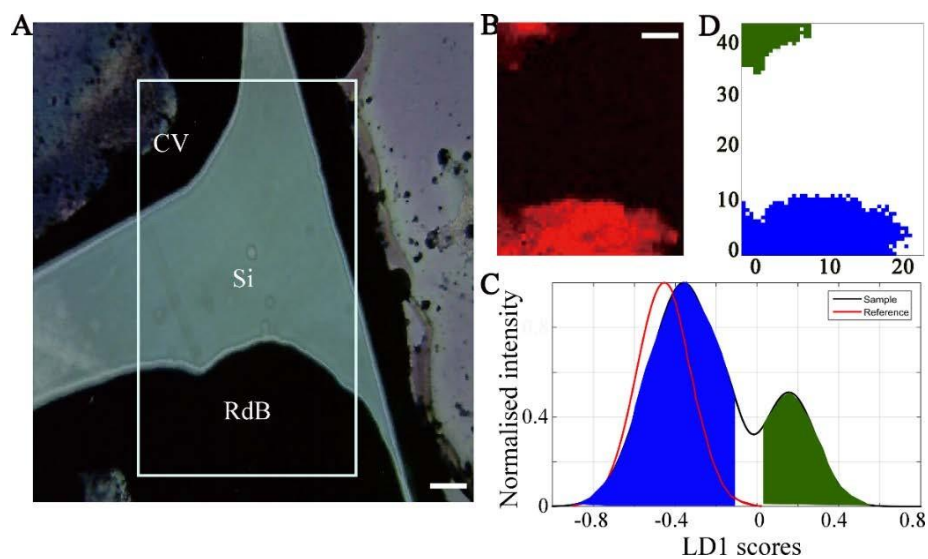

**Fig. S5** (A) Bright-field image of Rhodamine (RdB) and CV dried on a Si surface. (B) SERS intensity maps in the range of  $614\text{-}1724\text{ cm}^{-1}$ . (C) LD1 intensity curves of RdB (reference group) and RdB-CV (sample group). LD1 scores corresponding to the reference region are colored in blue and the non-corresponding area are colored in green. (D) Color-coded LD1 scores map reveals the spatial distribution of CV (green) and RdB (blue) within the map. Scale bar:  $50\text{ }\mu\text{m}$ .

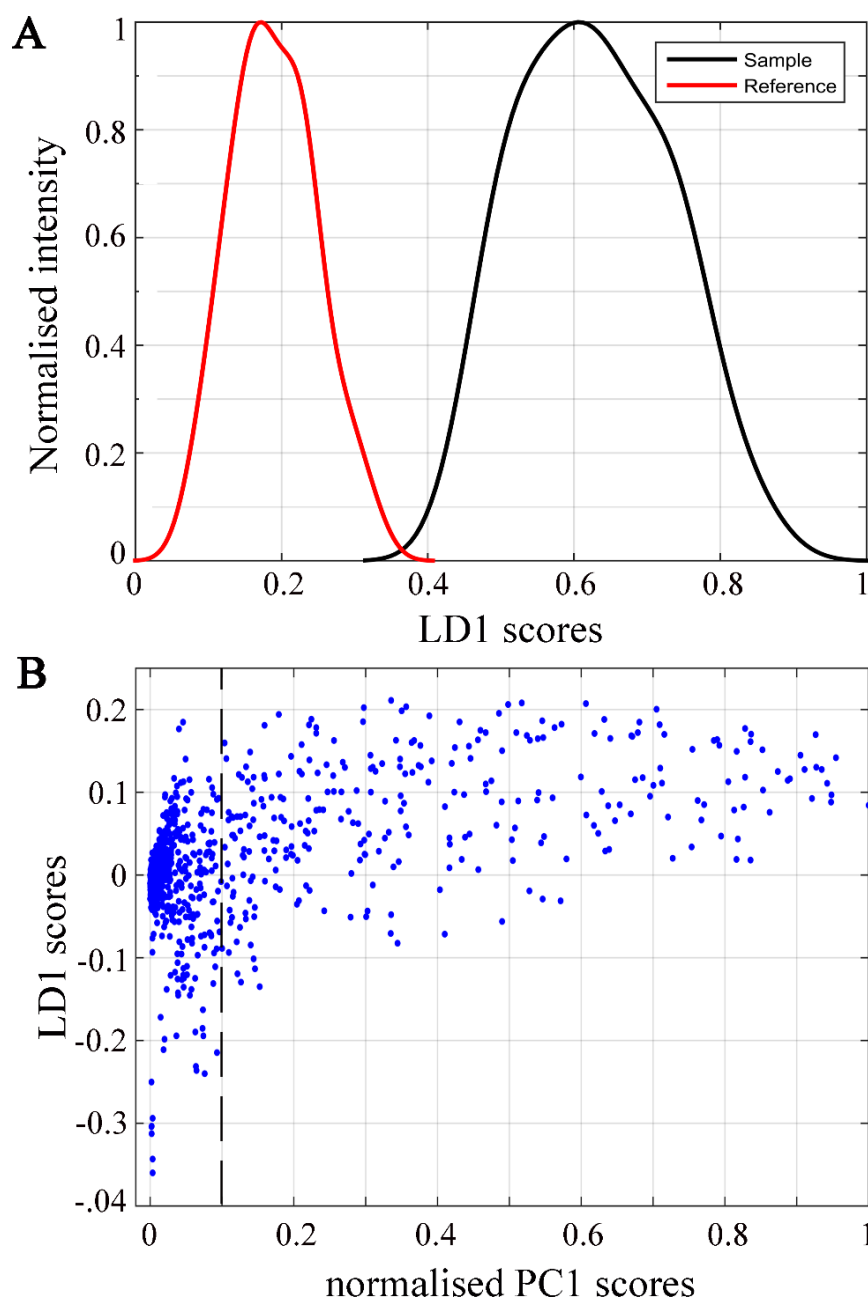

**Fig. S6** (A) LD1 intensity curves of the cell sample (black line) and the reference (red line) showing almost non- overlap of reference and sample. (B) PC1 vs. LD1 scores plot of the sample (Fig. 5 in the main paper) served the spectra with lower 10% of the PC1 scores values as the sample background.

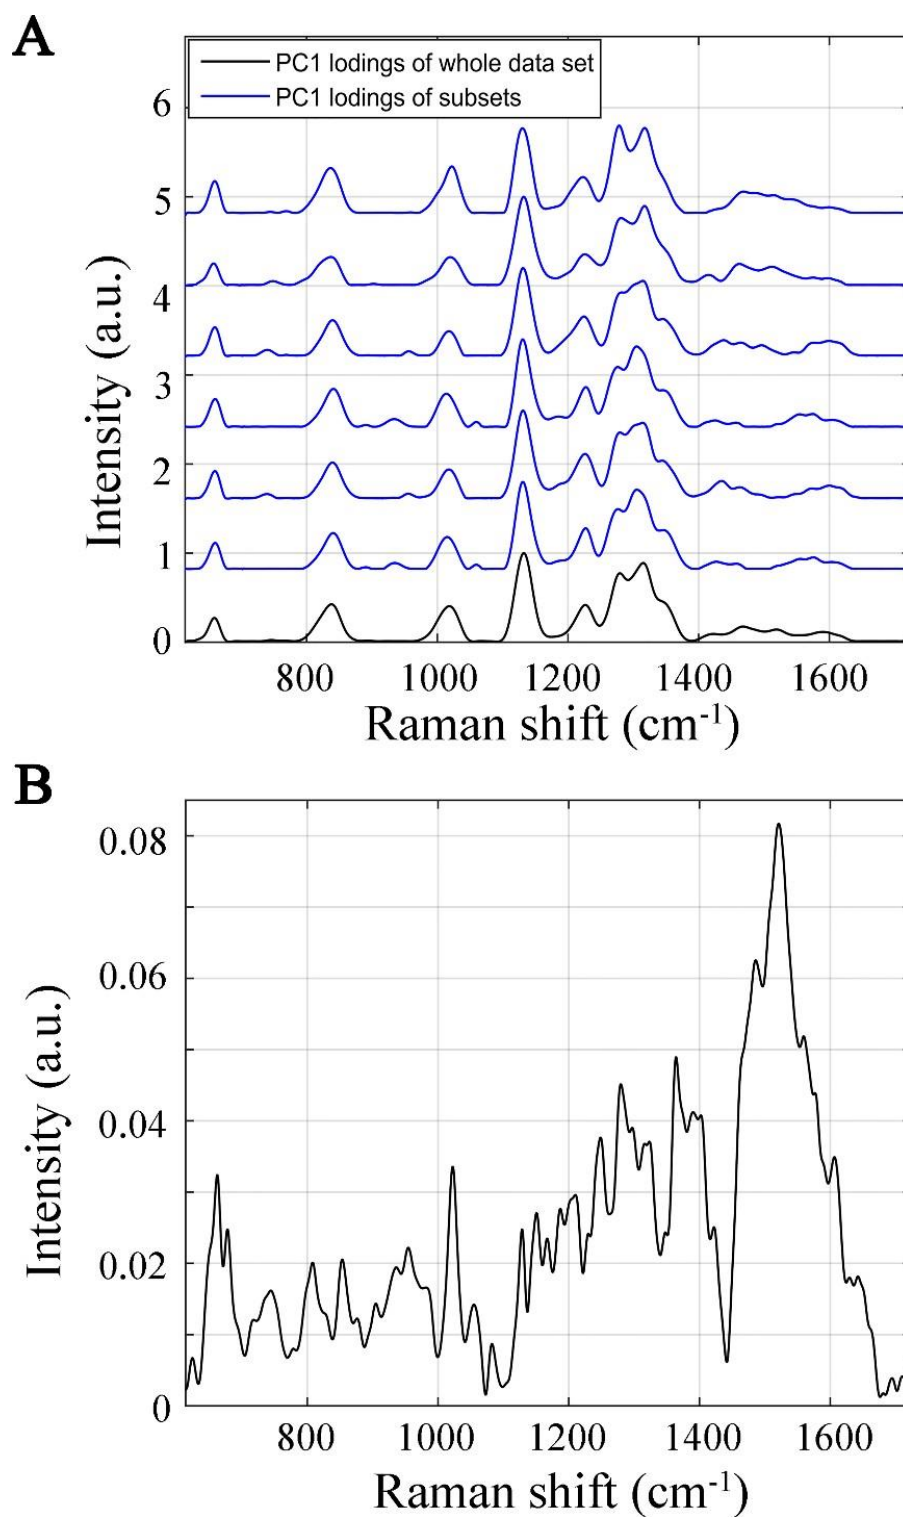

**Fig. S7** (A) PC1 loadings of the whole data set (black) and six subsets (blue line). (B) The standard deviation of the PC1 loadings of the subsets.

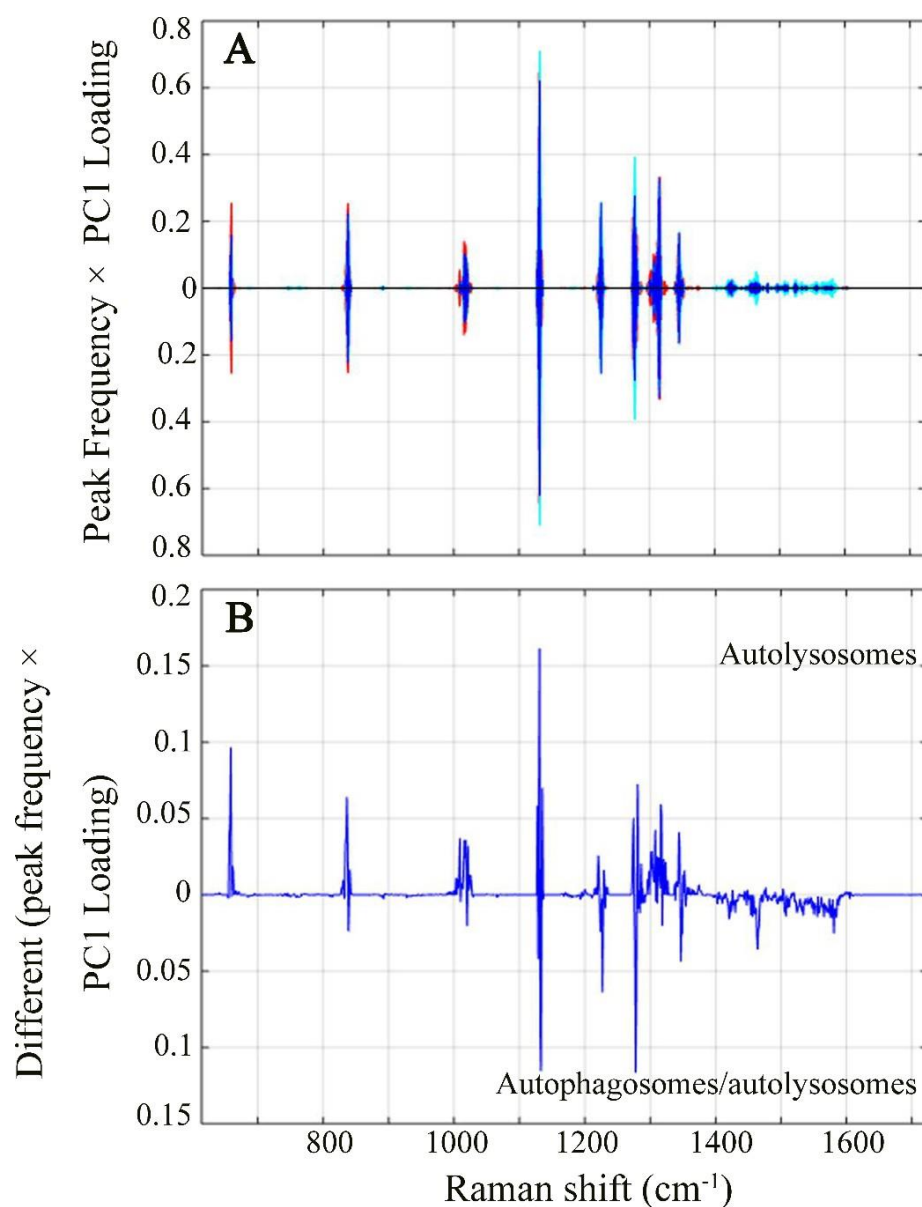

**Fig.S8**(A) The PC1 loadings weighted by the frequency of peak occurrence are shown in red (autolysosomes), azure (autophagosomes/autolysosomes), and blue (the overlap of autolysosomes and autophagosomes/autolysosomes).  
 (B) Differences between the frequency-weighted PC1 loadings of autolysosomes and autophagosomes/autolysosomes.
