# Supplementary figures and images for: Investigating the autophagy pathway in silver@gold core–shell nanoparticles-treated cells using surface-enhanced Raman scattering
Source: Royal Society of Chemistry journal article supplement (doi:10.1039/c8an00405f), 2018-01-01

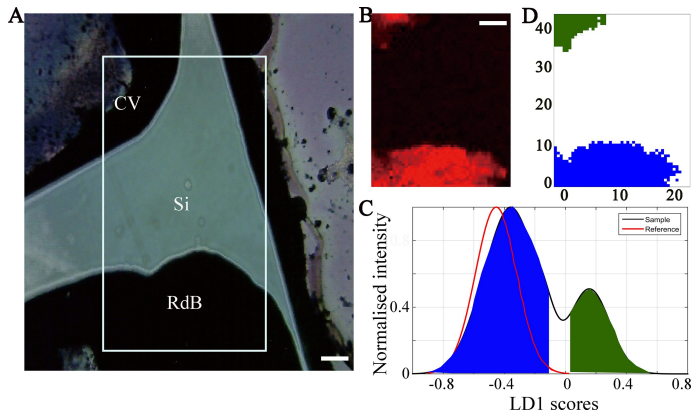

Supplement: c8an00405f3.pdf [file c8an00405f3.pdf]
